# Supplementary material for: Tuning the coordination sphere of octahedral Dy(iii) complexes with silanolate/stannanolate ligands: synthesis, structures and slow relaxation of the magnetization
Source: Royal Society of Chemistry journal article supplement (doi:10.1039/d1ce01266e), 2021-01-01
Supplement: d1ce01266e1.pdf [file d1ce01266e1.pdf]

SUPPORTING INFORMATION

## **Tuning the coordination sphere of octahedral Dy(III) complexes with silanolate/stannanolate ligands: synthesis, structures and field-induced slow relaxation of the magnetization**

**Jérôme Long<sup>\*,a,b</sup> Aleksei O. Tolpygin,<sup>c,d</sup> Anton V. Cherkasov,<sup>c</sup> Yulia V. Nelyubina,<sup>d</sup> Yannick Guari,<sup>a</sup> Joulia Larionova<sup>a</sup> and Alexander A. Trifonov<sup>\*c,d</sup>**

*<sup>a</sup> ICGM, Univ. Montpellier, CNRS, ENSCM, Montpellier, France. E-mail: jerome.long@umontpellier.fr*

*<sup>b</sup> Institut Universitaire de France (IUF), 1 rue Descartes, 75231 Paris Cedex 05, France.*

*<sup>c</sup> Institute of Organometallic Chemistry of Russian Academy of Sciences, 49 Tropinina str., GSP-445, 603950, Nizhny Novgorod, Russia. E-mail: trif@iomc.ras.ru*

*<sup>d</sup> A.N. Nesmeyanov Institute of Organoelement Compounds of Russian Academy of Sciences, 28 Vavilova str., 119334, Moscow, Russia.*

## TABLE OF CONTENTS

|                                                                                                                                                                                                          |    |
|----------------------------------------------------------------------------------------------------------------------------------------------------------------------------------------------------------|----|
| Figure S1: Perspective view of the crystal packing for 1 and 2 along the <i>b</i> crystallographic axes. Hydrogen atoms have been omitted for clarity.....                                               | 3  |
| Figure S2: Perspective view of the crystal packing for 3 and 4 along the <i>b</i> crystallographic axes. Hydrogen atoms have been omitted for clarity.....                                               | 4  |
| Figure S3: Temperature dependence of $\chi T$ under an applied magnetic field of 1000 Oe for 1-4 Inset: field dependence of the magnetization at 1.8 K for 1-4. ....                                     | 5  |
| Figure S4: Frequency dependence of $\chi'$ and $\chi''$ for 1-4 for different temperatures performed in zero magnetic static field. ....                                                                 | 6  |
| Figure S5: Cole-Cole (Argand) plots obtained using the ac susceptibility data for 4 in zero magnetic field. The solid lines correspond to the best fit obtained with a generalized Debye model.....      | 7  |
| Figure S6: Frequency dependence of $\chi'$ and $\chi''$ for 1-4 for various dc fields. ....                                                                                                              | 8  |
| Figure S7: Field dependence of the relaxation time at 2 K (1-3) and 5 K (4). The solid line represents the fit with Eq. 2. ....                                                                          | 9  |
| Figure S8: Frequency dependence of $\chi'$ and $\chi''$ for different temperatures performed under a 500 (1-3) or 1000 (4) Oe dc field. ....                                                             | 10 |
| Figure S9: Cole-Cole (Argand) plots obtained using the ac susceptibility data for 1-3 (500 Oe) and 4 (1000 Oe). The solid lines correspond to the best fit obtained with a generalized Debye model. .... | 11 |
| Figure S10: Anisotropic axes (purple) obtained from the MAGELLAN package. <sup>1</sup> .....                                                                                                             | 12 |
|                                                                                                                                                                                                          |    |
| Table S1: Crystal data, data collection and structure refinement details for 1, 2, 3, 4. ....                                                                                                            | 13 |
| Table S2: SHAPE analysis for 1-4.....                                                                                                                                                                    | 14 |
| Table S3: Selected bond lengths (Å) and angles (deg) for 1-4. ....                                                                                                                                       | 15 |
| Table S4: Fitting of the Cole-Cole plots with a generalized Debye model under a 0 Oe dc field for 4. ....                                                                                                | 16 |
| Table S5: Fit parameters of the field dependence of the relaxation time at 30 K for 1, 2 and 4. ....                                                                                                     | 16 |
| Table S6: Fitting of the Cole-Cole plots with a generalized Debye model under a 500 Oe dc field for 1. ....                                                                                              | 16 |
| Table S7: Fitting of the Cole-Cole plots with a generalized Debye model under a 500 Oe dc field for 2. ....                                                                                              | 17 |
| Table S8: Fitting of the Cole-Cole plots with a generalized Debye model under a 500 Oe dc field for 3. ....                                                                                              | 17 |
| Table S9: Fitting of the Cole-Cole plots with a generalized Debye model under a 1000 Oe dc field for 4. ....                                                                                             | 18 |

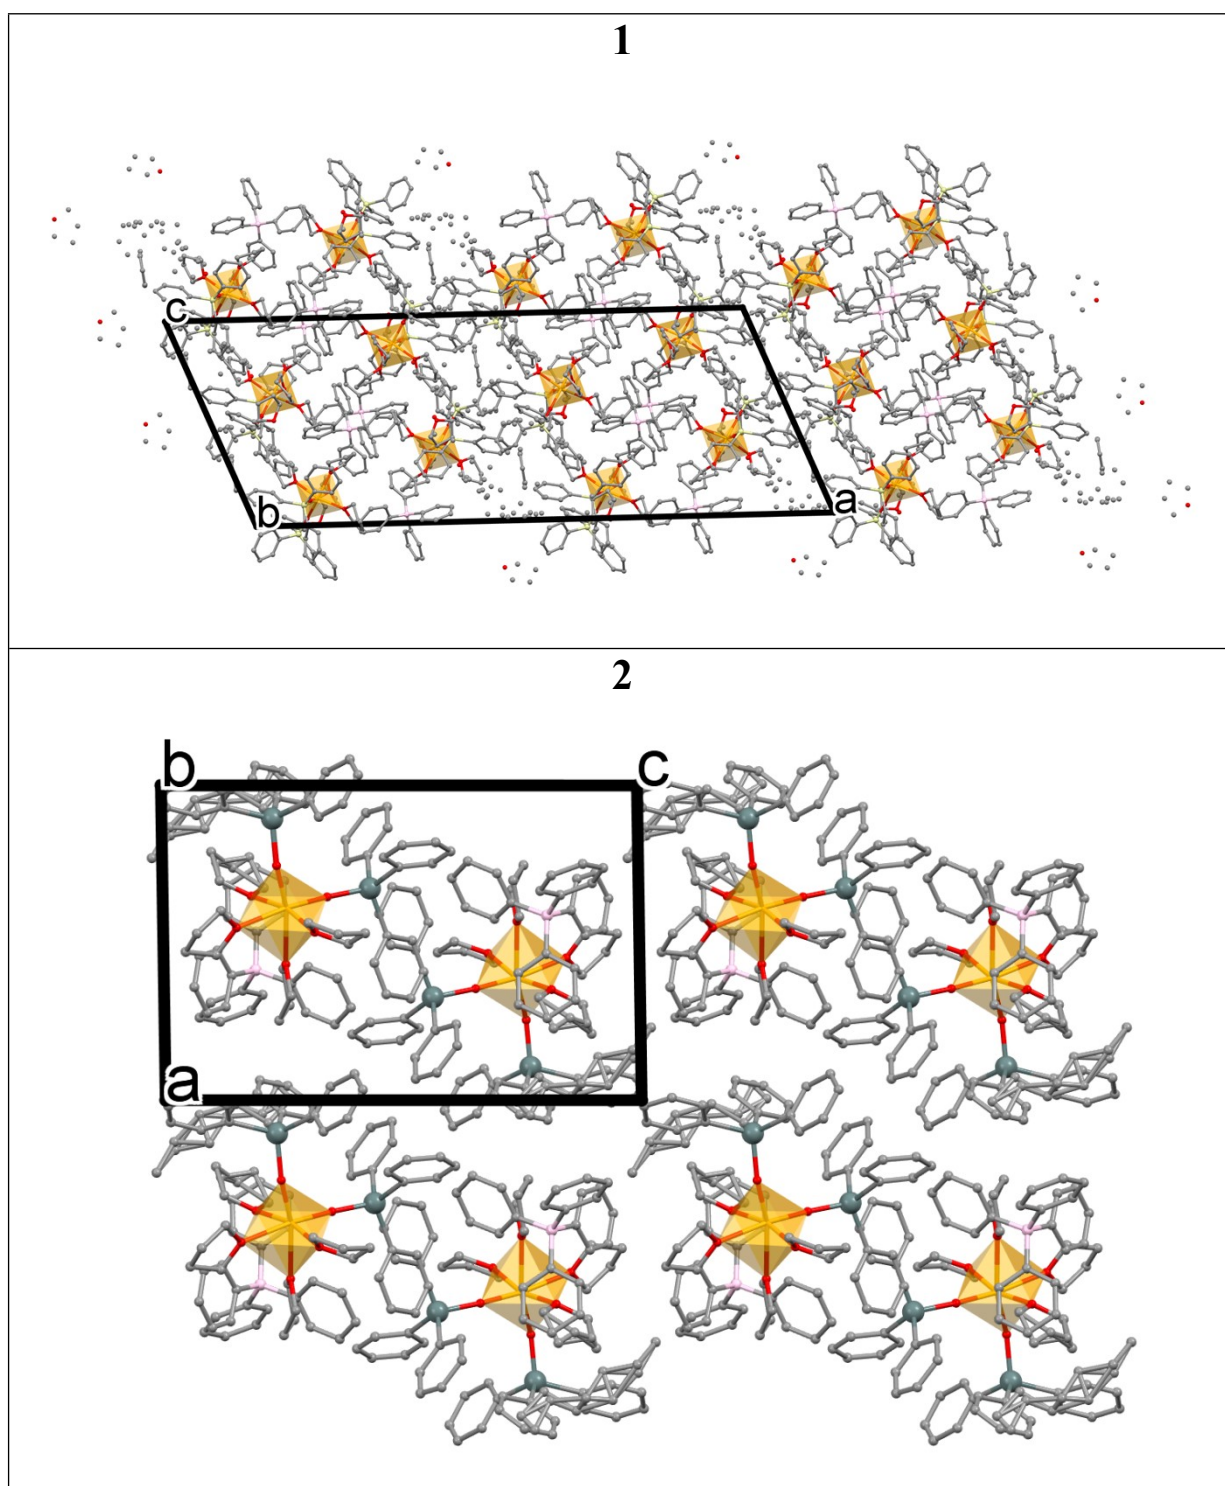

**Figure S1:** Perspective view of the crystal packing for **1** and **2** along the *b* crystallographic axes. Hydrogen atoms have been omitted for clarity.

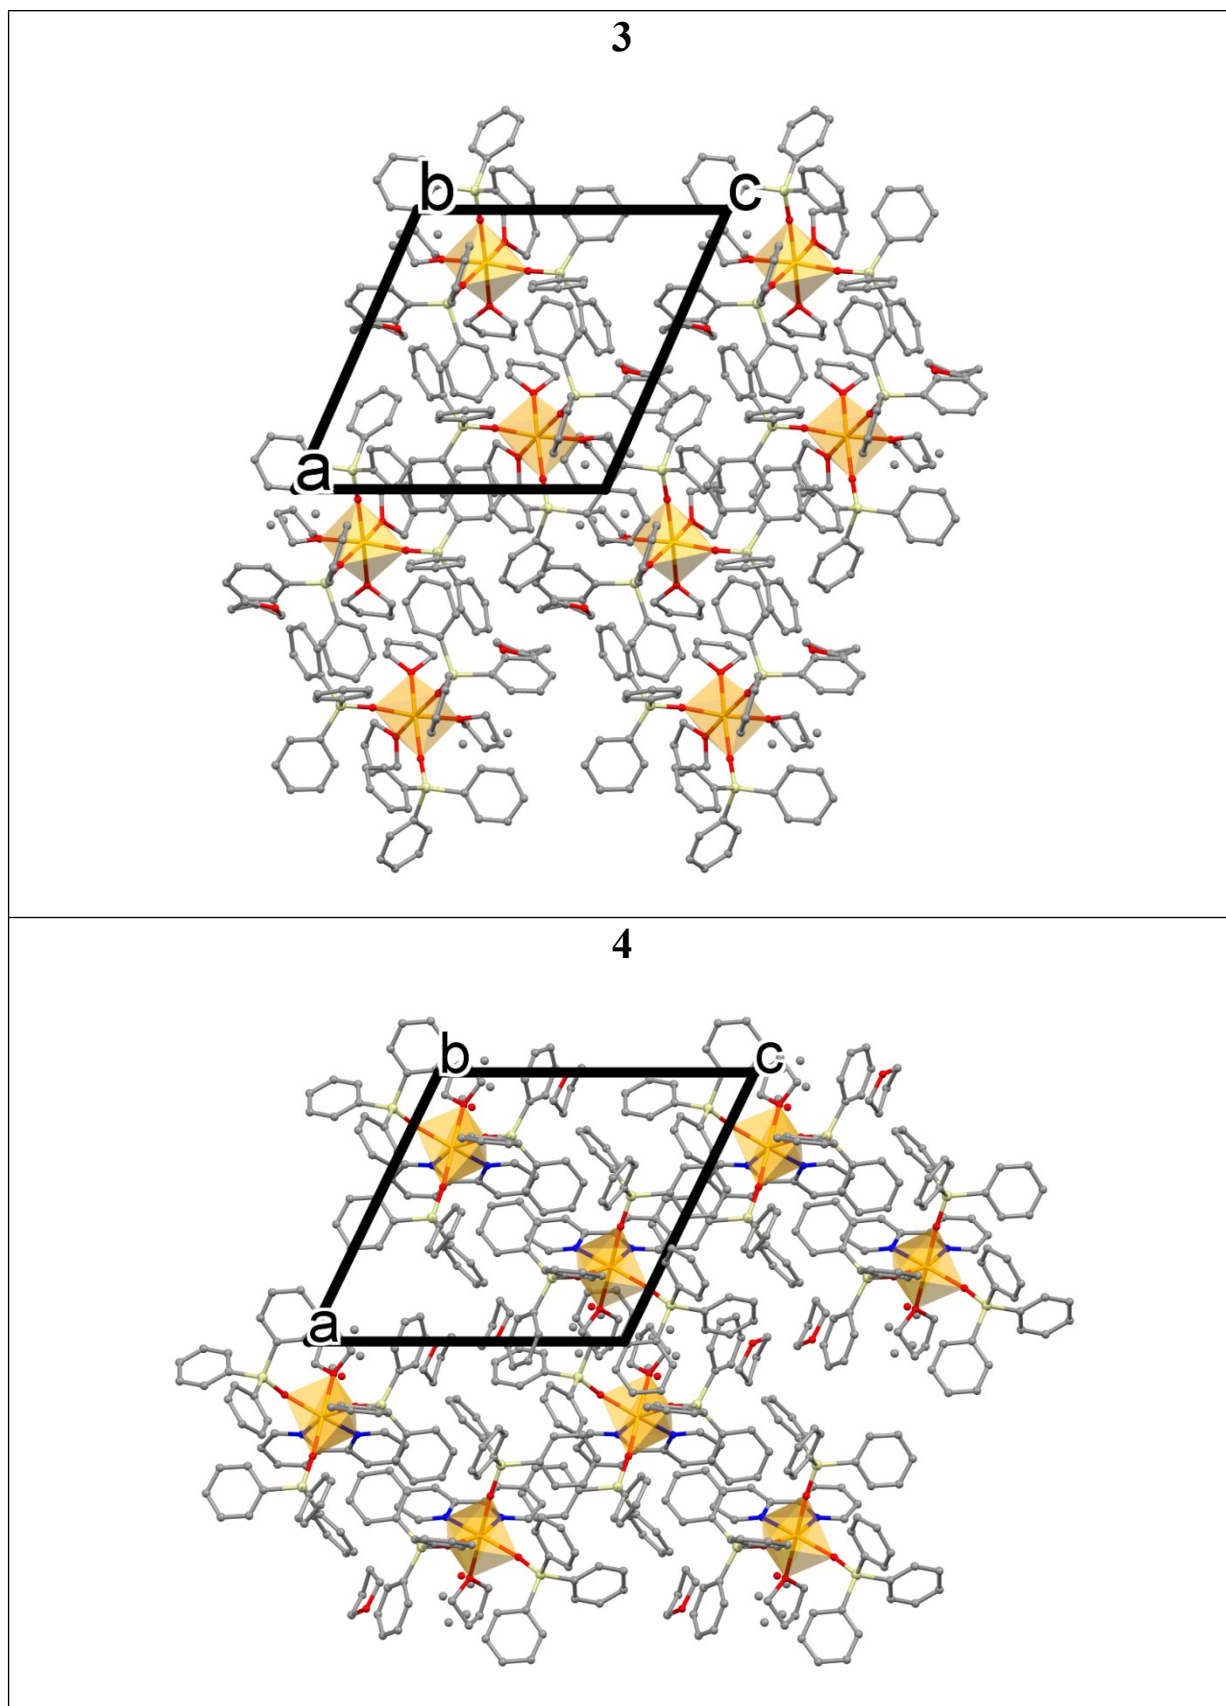

**Figure S2:** Perspective view of the crystal packing for **3** and **4** along the *b* crystallographic axes.  
Hydrogen atoms have been omitted for clarity

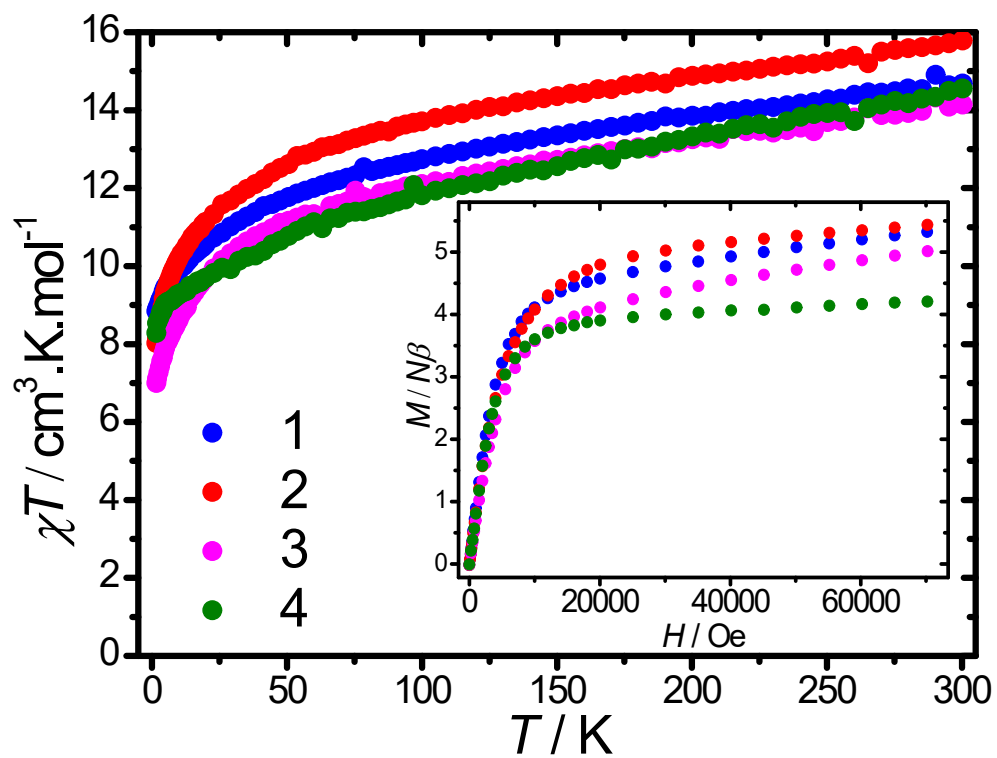

**Figure S3:** Temperature dependence of  $\chi T$  under an applied magnetic field of 1000 Oe for 1-4 Inset: field dependence of the magnetization at 1.8 K for 1-4.

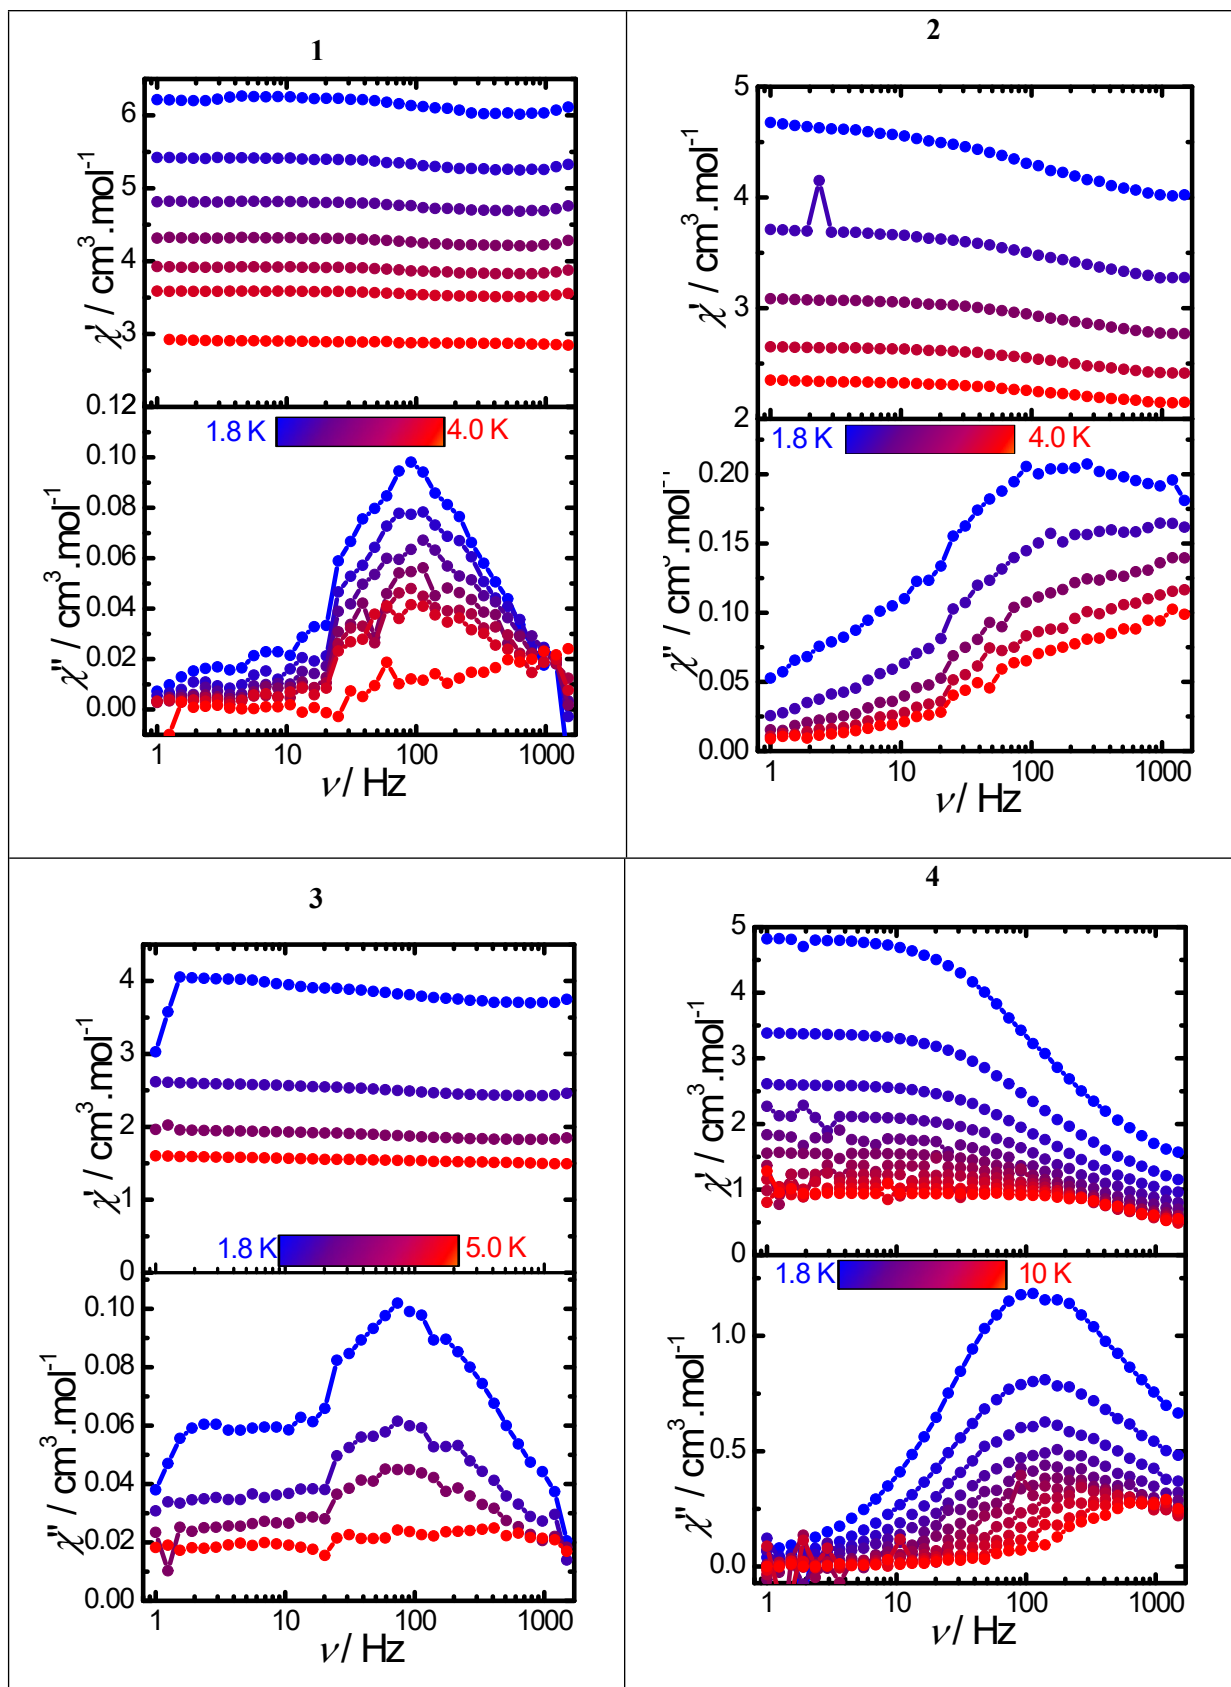

**Figure S4:** Frequency dependence of  $\chi'$  and  $\chi''$  for 1–4 for different temperatures performed in zero magnetic static field.

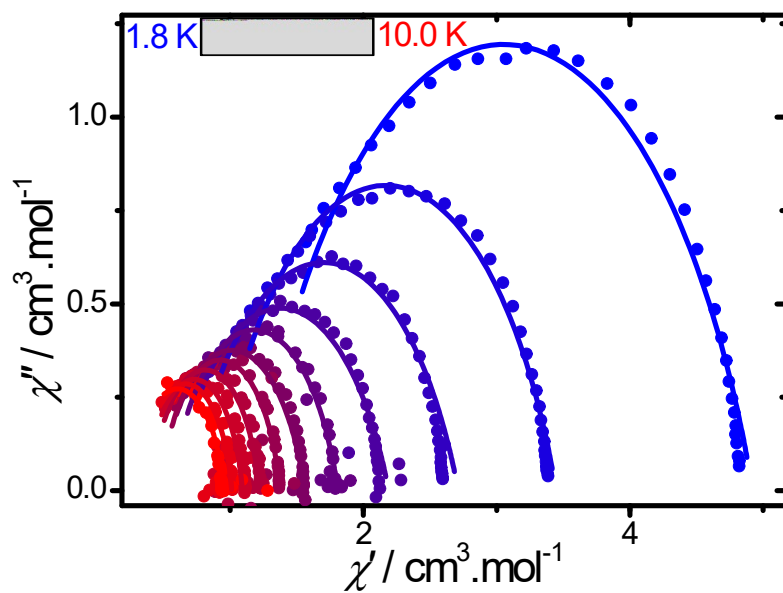

**Figure S5:** Cole-Cole (Argand) plots obtained using the ac susceptibility data for **4** in zero magnetic field. The solid lines correspond to the best fit obtained with a generalized Debye model

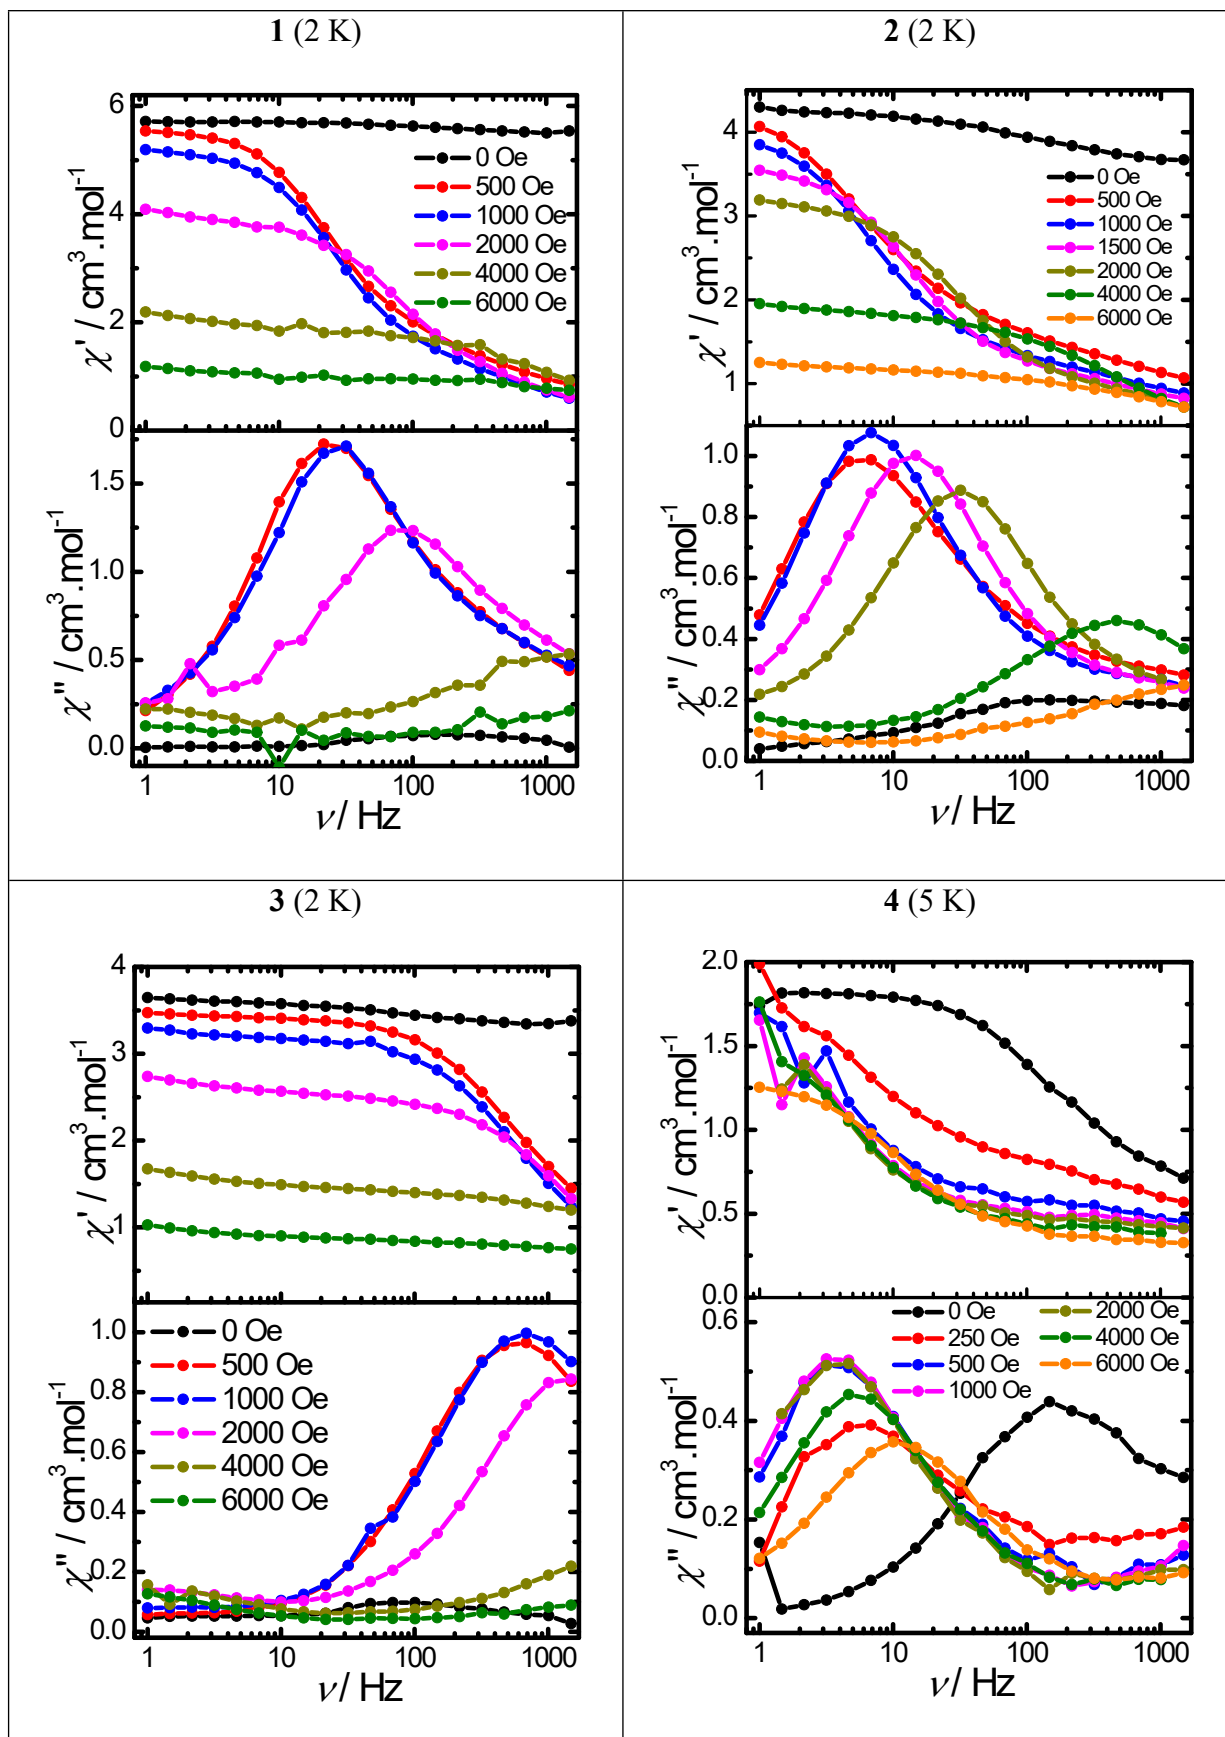

Figure S6: Frequency dependence of  $\chi'$  and  $\chi''$  for 1-4 for various dc fields.



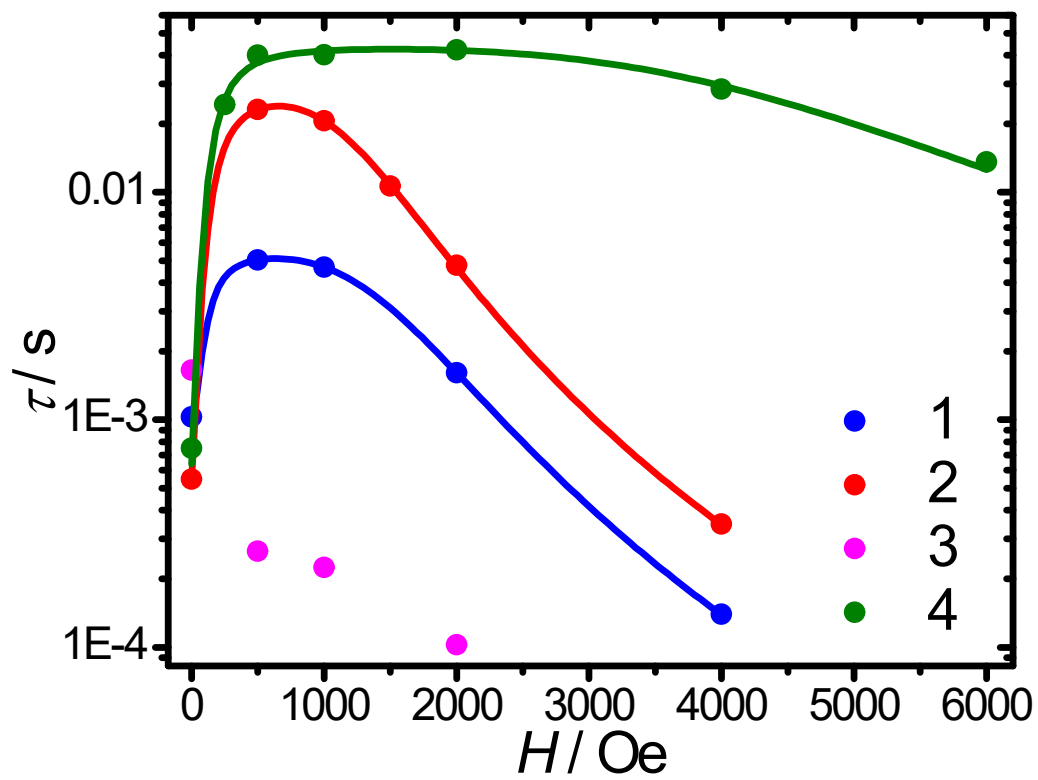

**Figure S7:** Field dependence of the relaxation time at 2 K (1-3) and 5 K (4). The solid line represents the fit with Eq. 2.

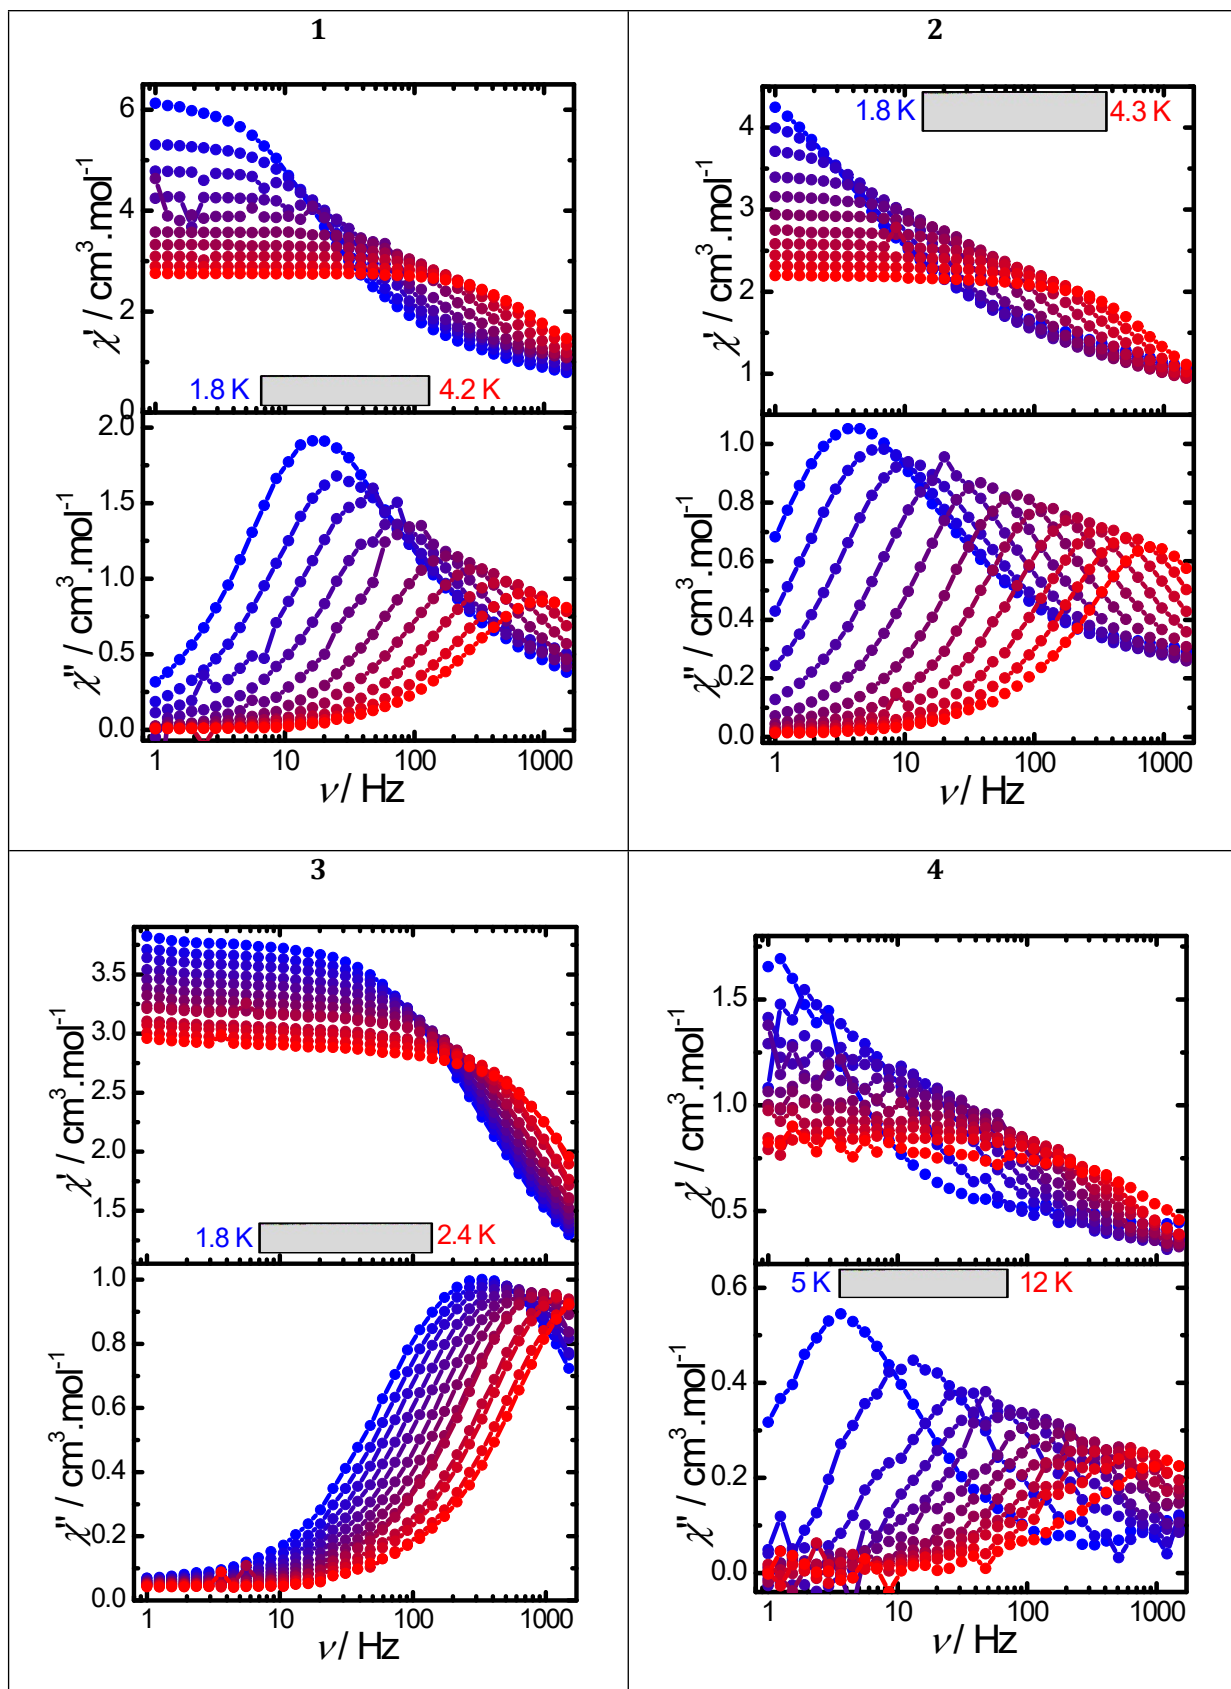

**Figure S8:** Frequency dependence of  $\chi'$  and  $\chi''$  for different temperatures performed under a 500 (1-3) or 1000 (4) Oe dc field.

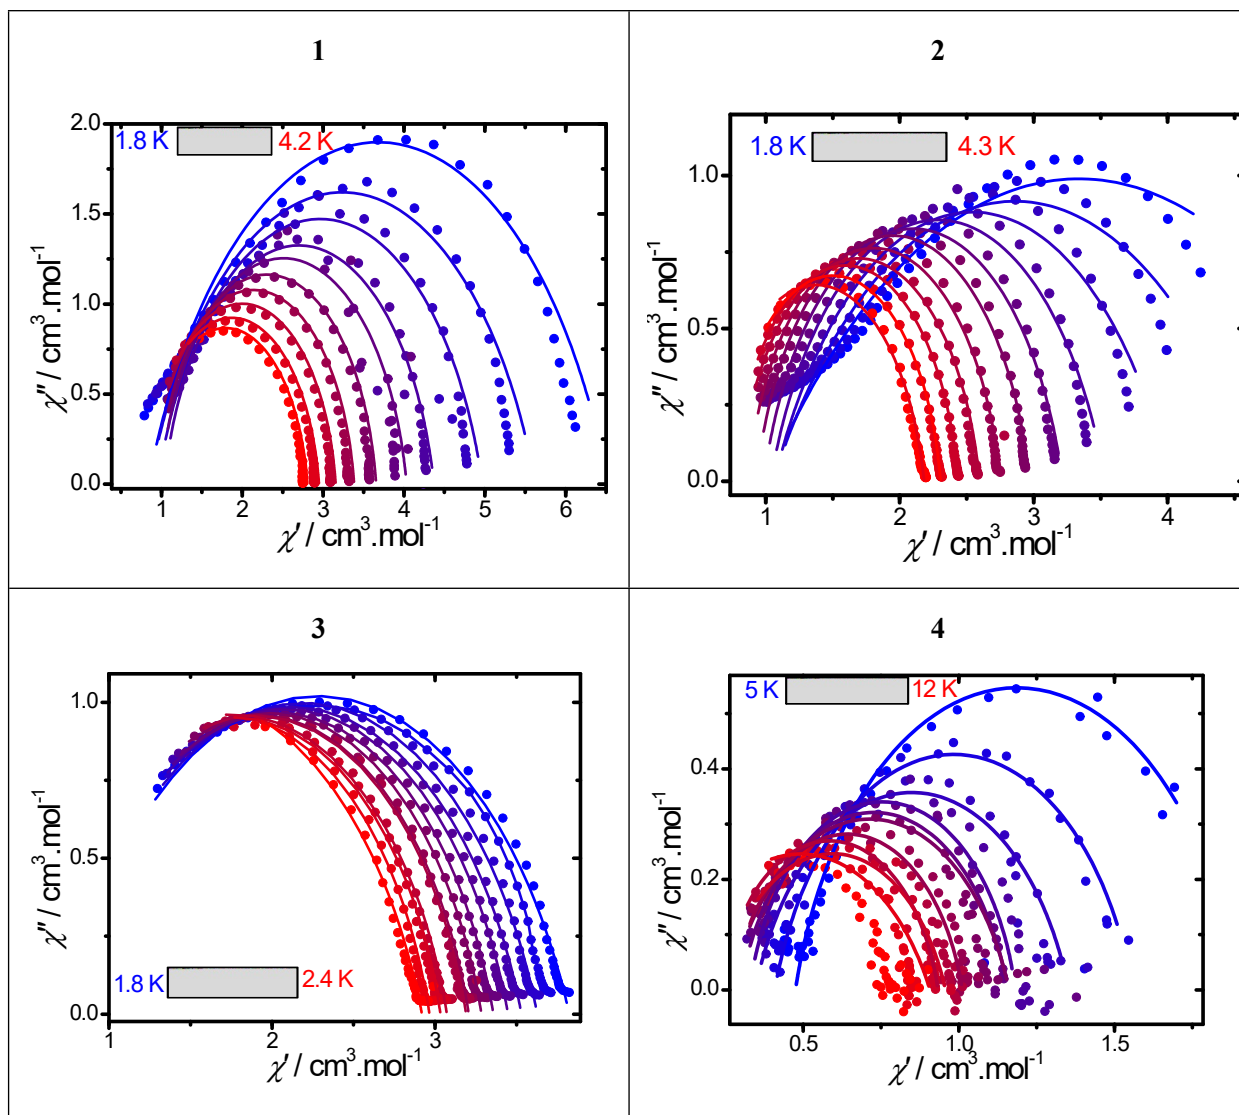

**Figure S9:** Cole-Cole (Argand) plots obtained using the ac susceptibility data for 1-3 (500 Oe) and 4 (1000 Oe). The solid lines correspond to the best fit obtained with a generalized Debye model.

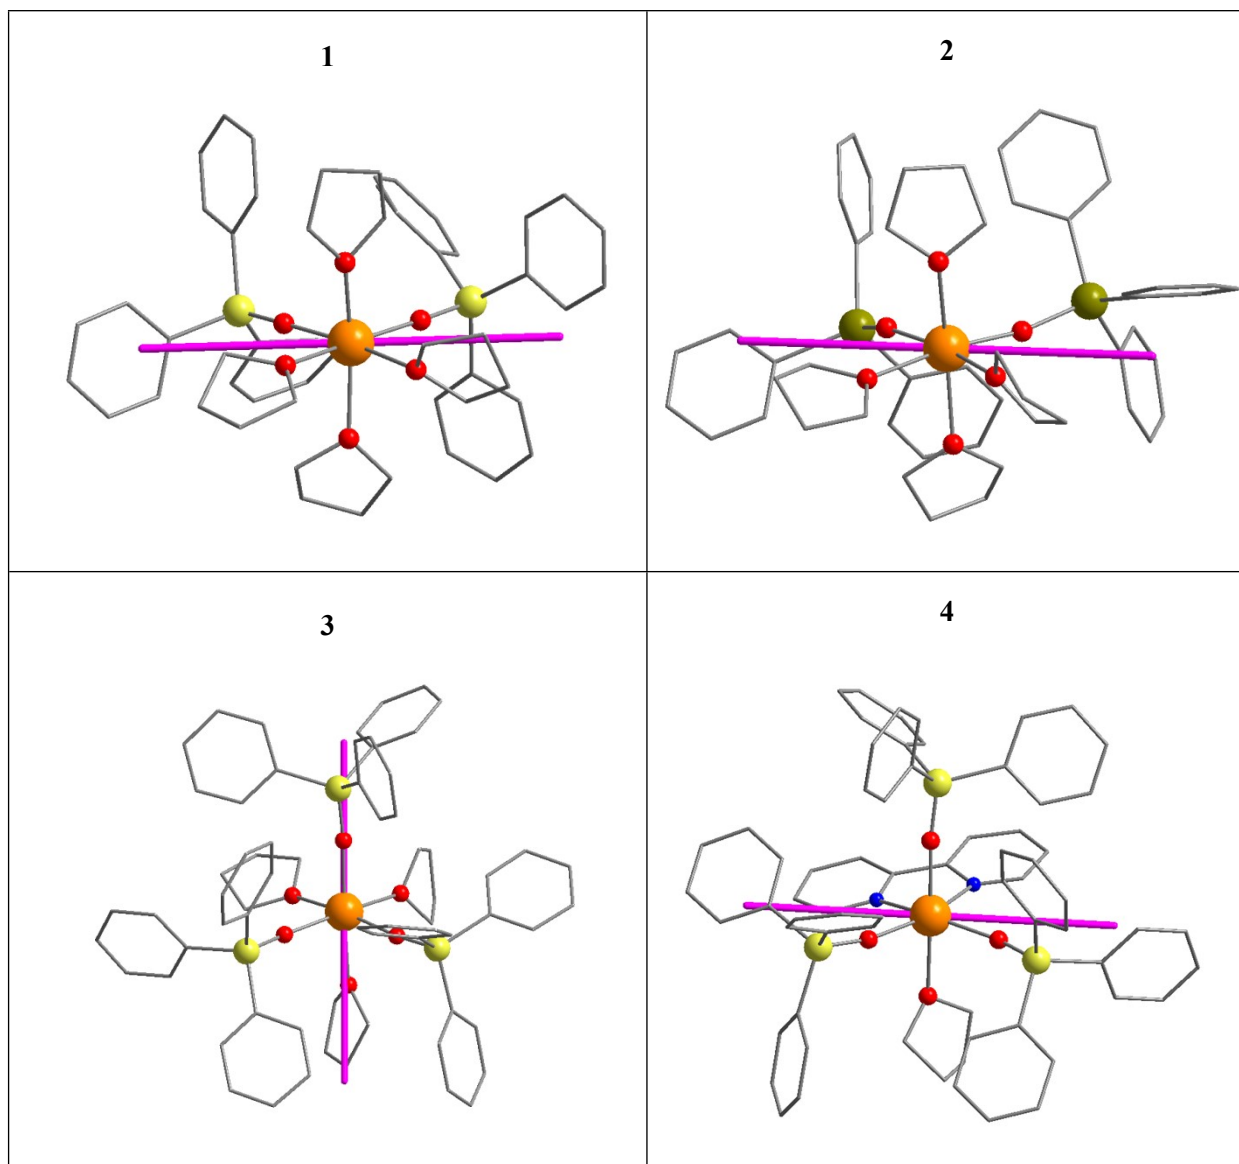

**Figure S10:** Anisotropic axes (purple) obtained from the MAGELLAN package.<sup>1</sup>

**Table S1:** Crystal data, data collection and structure refinement details for **1**, **2**, **3**, **4**.

|                                                                                           | <b>1</b>                                                                                                                                                                       | <b>2</b>                                                                                                                                | <b>3</b>                                                                                              | <b>4</b>                                                                                                             |
|-------------------------------------------------------------------------------------------|--------------------------------------------------------------------------------------------------------------------------------------------------------------------------------|-----------------------------------------------------------------------------------------------------------------------------------------|-------------------------------------------------------------------------------------------------------|----------------------------------------------------------------------------------------------------------------------|
| Formula                                                                                   | 2C <sub>52</sub> H <sub>62</sub> DyO <sub>6</sub> Si <sub>2</sub> ,<br>2C <sub>24</sub> H <sub>20</sub> B,<br>2C <sub>4</sub> H <sub>8</sub> O, ½C <sub>6</sub> H <sub>6</sub> | C <sub>52</sub> H <sub>62</sub> DyO <sub>6</sub> Sn <sub>2</sub> ,<br>C <sub>24</sub> H <sub>20</sub> B, C <sub>6</sub> H <sub>14</sub> | C <sub>66</sub> H <sub>69</sub> DyO <sub>6</sub> Si <sub>3</sub> ,<br>C <sub>4</sub> H <sub>8</sub> O | C <sub>68</sub> H <sub>61</sub> DyN <sub>2</sub> O <sub>4</sub><br>Si <sub>3</sub> , C <sub>4</sub> H <sub>8</sub> O |
| <i>M</i>                                                                                  | 2825.06                                                                                                                                                                        | 1588.27                                                                                                                                 | 1277.08                                                                                               | 1289.06                                                                                                              |
| <i>T</i> , K                                                                              | 120                                                                                                                                                                            | 100                                                                                                                                     | 120                                                                                                   | 100                                                                                                                  |
| Crystal system                                                                            | Monoclinic                                                                                                                                                                     | Triclinic                                                                                                                               | Monoclinic                                                                                            | Monoclinic                                                                                                           |
| Space group                                                                               | <i>C2/c</i>                                                                                                                                                                    | <i>P-1</i>                                                                                                                              | <i>P2<sub>1</sub></i>                                                                                 | <i>P2<sub>1</sub></i>                                                                                                |
| <i>Z</i> ( <i>Z'</i> )                                                                    | 8 (1)                                                                                                                                                                          | 2 (1)                                                                                                                                   | 2 (1)                                                                                                 | 2 (1)                                                                                                                |
| <i>a</i> , Å                                                                              | 46.8542(19)                                                                                                                                                                    | 14.2076(6)                                                                                                                              | 14.334(2)                                                                                             | 14.2745(4)                                                                                                           |
| <i>b</i> , Å                                                                              | 18.1479(8)                                                                                                                                                                     | 14.4956(6)                                                                                                                              | 16.468(2)                                                                                             | 16.2901(5)                                                                                                           |
| <i>c</i> , Å                                                                              | 18.2239(8)                                                                                                                                                                     | 20.1298(8)                                                                                                                              | 14.540(2)                                                                                             | 15.0762(4)                                                                                                           |
| <i>α</i> , deg                                                                            | 90                                                                                                                                                                             | 75.221(2)                                                                                                                               | 90                                                                                                    | 90                                                                                                                   |
| <i>β</i> , deg                                                                            | 112.5840(10)                                                                                                                                                                   | 83.003(2)                                                                                                                               | 113.635(3)                                                                                            | 115.8060(10)                                                                                                         |
| <i>γ</i> , deg                                                                            | 90                                                                                                                                                                             | 64.8030(10)                                                                                                                             | 90                                                                                                    | 90                                                                                                                   |
| <i>V</i> , Å <sup>3</sup>                                                                 | 14307.6(11)                                                                                                                                                                    | 3626.7(3)                                                                                                                               | 3144.3(8)                                                                                             | 3156.10(16)                                                                                                          |
| <i>d</i> <sub>calcd</sub> , g·cm <sup>-3</sup>                                            | 1.312                                                                                                                                                                          | 1.454                                                                                                                                   | 1.349                                                                                                 | 1.356                                                                                                                |
| <i>μ</i> , mm <sup>-1</sup>                                                               | 1.132                                                                                                                                                                          | 1.755                                                                                                                                   | 12.98                                                                                                 | 1.293                                                                                                                |
| <i>F</i> <sub>000</sub>                                                                   | 5884                                                                                                                                                                           | 1614                                                                                                                                    | 1322                                                                                                  | 1326                                                                                                                 |
| 2 <i>θ</i> <sub>max</sub> , deg                                                           | 50.00                                                                                                                                                                          | 57.57                                                                                                                                   | 52                                                                                                    | 60.22                                                                                                                |
| Number of measured refl.                                                                  | 54365                                                                                                                                                                          | 51646                                                                                                                                   | 41242                                                                                                 | 52387                                                                                                                |
| Number of independent refl. ( <i>R</i> <sub>int</sub> )                                   | 12598 (0.0870)                                                                                                                                                                 | 18780 (0.0529)                                                                                                                          | 12339 (0.1365)                                                                                        | 18482 (0.0392)                                                                                                       |
| Observed refl. [ <i>I</i> > 2σ( <i>I</i> )]                                               | 8557                                                                                                                                                                           | 13051                                                                                                                                   | 9051                                                                                                  | 15818                                                                                                                |
| Parameters                                                                                | 875                                                                                                                                                                            | 899                                                                                                                                     | 741                                                                                                   | 796                                                                                                                  |
| <i>R</i> <sub>1</sub> [ <i>F</i> <sup>2</sup> > 2σ( <i>F</i> <sup>2</sup> )]              | 0.0598                                                                                                                                                                         | 0.0452                                                                                                                                  | 0.0564                                                                                                | 0.0349                                                                                                               |
| <i>wR</i> <sub>2</sub> (all data)                                                         | 0.1570                                                                                                                                                                         | 0.0901                                                                                                                                  | 0.1104                                                                                                | 0.0572                                                                                                               |
| <i>S</i> ( <i>F</i> <sup>2</sup> )                                                        | 1.016                                                                                                                                                                          | 1.040                                                                                                                                   | 0.996                                                                                                 | 1.031                                                                                                                |
| Residual density ( <i>d</i> <sub>max</sub> / <i>d</i> <sub>min</sub> ), e·Å <sup>-3</sup> | 2.26 / -2.03                                                                                                                                                                   | 2.17 / -1.60                                                                                                                            | 1.29/-1.10                                                                                            | 0.66 / -0.54                                                                                                         |

**Table S2:** SHAPE analysis for 1-4.

|          | <b>HP</b> | <b>PPY</b> | <b>OC</b> | <b>TPR</b> | <b>JPPY</b> |
|----------|-----------|------------|-----------|------------|-------------|
| <b>1</b> | 31.923    | 27.382     | 0.461     | 14.634     | 30.968      |
| <b>2</b> | 32.907    | 27.334     | 0.429     | 15.136     | 31.036      |
| <b>3</b> | 32.708    | 29.268     | 0.414     | 16.110     | 32.752      |
| <b>4</b> | 31.347    | 23.384     | 1.907     | 10.947     | 27.345      |

HP: Hexagon  
PPY: Pentagonal Pyramid  
OC: Octahedron  
TPR: Trigonal Prism  
JPPY: Johnson Pentagonal Pyramid

**Table S3:** Selected bond lengths (Å) and angles (deg) for **1-4**.

| <b>1</b>        |          |
|-----------------|----------|
| Dy(1)-O(1)      | 2.093(5) |
| Dy(1)-O(2)      | 2.108(5) |
| Dy(1)-O(3)      | 2.357(7) |
| Dy(1)-O(4)      | 2.405(5) |
| Dy(1)-O(5)      | 2.410(5) |
| Dy(1)-O(6)      | 2.331(5) |
| O(1)-Dy(1)-O(2) | 102.6(2) |
| <b>2</b>        |          |
| Dy(1)-O(1)      | 2.068(3) |
| Dy(1)-O(3)      | 2.358(3) |
| Dy(1)-O(2)      | 2.068(3) |
| Dy(1)-O(4)      | 2.473(3) |
| Dy(1)-O(5)      | 2.430(3) |
| Dy(1)-O(6)      | 2.366(3) |
| O(2)-Dy(1)-O(1) | 105.2(2) |
| <b>3</b>        |          |
| Dy(1)-O(1)      | 2.118(8) |
| Dy(1)-O(2)      | 2.136(8) |
| Dy(1)-O(3)      | 2.132(8) |
| Dy(1)-O(4)      | 2.478(8) |
| Dy(1)-O(5)      | 2.448(8) |
| Dy(1)-O(6)      | 2.423(8) |
| O(1)-Dy(1)-O(2) | 102.0(3) |
| O(1)-Dy(1)-O(3) | 101.8(3) |
| O(2)-Dy(1)-O(3) | 101.2(3) |
| <b>4</b>        |          |
| Dy(1)-O(1)      | 2.123(2) |
| Dy(1)-O(2)      | 2.135(3) |
| Dy(1)-O(3)      | 2.135(2) |
| Dy(1)-O(4)      | 2.402(8) |
| Dy(1)-N(1)      | 2.518(3) |
| Dy(1)-N(2)      | 2.543(3) |
| O(1)-Dy(1)-O(2) | 96.9(2)  |
| O(1)-Dy(1)-O(3) | 99.4(2)  |
| O(2)-Dy(1)-O(3) | 111.7(2) |
| N(1)-Dy(1)-N(2) | 63.5(2)  |

**Table S4:** Fitting of the Cole-Cole plots with a generalized Debye model under a 0 Oe dc field for **4**.

| $T$ (K) | $\chi_S$ (cm <sup>3</sup> . mol <sup>-1</sup> ) | $\chi_T$ (cm <sup>3</sup> . mol <sup>-1</sup> ) | $\alpha$ |
|---------|-------------------------------------------------|-------------------------------------------------|----------|
| 1.8     | 1.18436                                         | 4.92321                                         | 0.27607  |
| 2.61977 | 0.88795                                         | 3.44602                                         | 0.27619  |
| 3.4398  | 0.68705                                         | 2.7122                                          | 0.30912  |
| 4.25836 | 0.56742                                         | 2.18912                                         | 0.30963  |
| 5.07962 | 0.55174                                         | 1.80843                                         | 0.23543  |
| 5.89962 | 0.46386                                         | 1.55925                                         | 0.23382  |
| 6.71949 | 0.47892                                         | 1.37382                                         | 0.15486  |
| 7.53918 | 0.40634                                         | 1.21703                                         | 0.14317  |
| 8.35943 | 0.37068                                         | 1.09015                                         | 0.11905  |
| 9.17917 | 0.32283                                         | 1.01084                                         | 0.11746  |
| 9.99874 | 0.25093                                         | 0.95505                                         | 0.16096  |

**Table S5:** Fit parameters of the field dependence of the relaxation time at 30 K for **1**, **2** and **4**.

| <i>Compound</i> | $D$ (s <sup>-1</sup> K <sup>-1</sup> Oe <sup>-4</sup> ) | $B_1$ (s <sup>-1</sup> ) | $B_2$ (Oe <sup>-2</sup> ) | $K$   |
|-----------------|---------------------------------------------------------|--------------------------|---------------------------|-------|
| <b>1</b> (2 K)  | $1.37 \times 10^{-11}$                                  | 791.1                    | $2.2 \times 10^{-4}$      | 182.4 |
| <b>2</b> (2 K)  | $5.59 \times 10^{-11}$                                  | 1786.5                   | $1.0 \times 10^{-3}$      | 35.7  |
| <b>4</b> (5 K)  | $8.71 \times 10^{-15}$                                  | 1544.2                   | $1.5 \times 10^{-3}$      | 22.8  |

**Table S6:** Fitting of the Cole-Cole plots with a generalized Debye model under a 500 Oe dc field for **1**.

| $T$ (K) | $\chi_S$ (cm <sup>3</sup> . mol <sup>-1</sup> ) | $\chi_T$ (cm <sup>3</sup> . mol <sup>-1</sup> ) | $\alpha$ |
|---------|-------------------------------------------------|-------------------------------------------------|----------|
| 1.79965 | 0.8376                                          | 6.52562                                         | 0.25055  |
| 2.07507 | 0.85156                                         | 5.62576                                         | 0.2406   |
| 2.35002 | 0.9557                                          | 4.97048                                         | 0.19423  |
| 2.62481 | 1.03054                                         | 4.37047                                         | 0.14566  |
| 2.89974 | 0.98583                                         | 4.03259                                         | 0.12286  |
| 3.17458 | 0.95627                                         | 3.65514                                         | 0.09389  |
| 3.4497  | 0.8889                                          | 3.38252                                         | 0.09188  |
| 3.72527 | 0.84148                                         | 3.15429                                         | 0.09081  |
| 3.99958 | 0.79866                                         | 2.94799                                         | 0.09585  |
| 4.19853 | 0.78599                                         | 2.80487                                         | 0.09651  |



**Table S7:** Fitting of the Cole-Cole plots with a generalized Debye model under a 500 Oe dc field for 2.

| $T$ (K) | $\chi_s$ (cm <sup>3</sup> . mol <sup>-1</sup> ) | $\chi_T$ (cm <sup>3</sup> . mol <sup>-1</sup> ) | $\alpha$ |
|---------|-------------------------------------------------|-------------------------------------------------|----------|
| 1.80218 | 1.00325                                         | 5.6707                                          | 0.48934  |
| 2.04996 | 1.05139                                         | 4.66984                                         | 0.40316  |
| 2.30018 | 1.06192                                         | 4.02239                                         | 0.31654  |
| 2.5498  | 1.03558                                         | 3.53514                                         | 0.23601  |
| 2.79963 | 0.98364                                         | 3.21668                                         | 0.18857  |
| 3.04951 | 0.9309                                          | 2.96962                                         | 0.14965  |
| 3.29967 | 0.8645                                          | 2.75051                                         | 0.13397  |
| 3.54972 | 0.7954                                          | 2.59521                                         | 0.13293  |
| 3.79977 | 0.75656                                         | 2.43587                                         | 0.10981  |
| 4.04886 | 0.698                                           | 2.30415                                         | 0.11186  |
| 4.29848 | 0.57322                                         | 2.18138                                         | 0.14158  |

**Table S8:** Fitting of the Cole-Cole plots with a generalized Debye model under a 500 Oe dc field for 3.

| $T$ (K) | $\chi_s$ (cm <sup>3</sup> . mol <sup>-1</sup> ) | $\chi_T$ (cm <sup>3</sup> . mol <sup>-1</sup> ) | $\alpha$ |
|---------|-------------------------------------------------|-------------------------------------------------|----------|
| 1.79968 | 0.74388                                         | 3.8234                                          | 0.25486  |
| 1.84993 | 0.73539                                         | 3.71751                                         | 0.24394  |
| 1.8997  | 0.75153                                         | 3.6271                                          | 0.22737  |
| 1.94989 | 0.71801                                         | 3.53032                                         | 0.22192  |
| 1.99986 | 0.71799                                         | 3.44788                                         | 0.20788  |
| 2.04986 | 0.7162                                          | 3.35793                                         | 0.19516  |
| 2.0998  | 0.67638                                         | 3.2847                                          | 0.18849  |
| 2.14981 | 0.61073                                         | 3.20706                                         | 0.1888   |
| 2.2498  | 0.46786                                         | 3.07257                                         | 0.19034  |
| 2.29994 | 0.51861                                         | 3.03322                                         | 0.17492  |

**Table S9:** Fitting of the Cole-Cole plots with a generalized Debye model under a 1000 Oe dc field for 4.

| $T$ (K)  | $\chi_S$ (cm <sup>3</sup> . mol <sup>-1</sup> ) | $\chi_T$ (cm <sup>3</sup> . mol <sup>-1</sup> ) | $\alpha$ |
|----------|-------------------------------------------------|-------------------------------------------------|----------|
| 4.99973  | 0.475                                           | 1.9                                             | 0.165    |
| 5.99929  | 0.409                                           | 1.56                                            | 0.188    |
| 6.99907  | 0.346                                           | 1.35                                            | 0.214    |
| 7.499    | 0.328                                           | 1.18                                            | 0.143    |
| 7.99948  | 0.297                                           | 1.16                                            | 0.182    |
| 8.49883  | 0.266                                           | 1.16                                            | 0.23     |
| 8.99932  | 0.273                                           | 1.01                                            | 0.169    |
| 9.49928  | 0.237                                           | 0.933                                           | 0.16     |
| 9.99876  | 0.232                                           | 0.957                                           | 0.239    |
| 10.49756 | 2.15E-14                                        | 0.967                                           | 0.419    |
| 10.99589 | 0.0761                                          | 0.908                                           | 0.32     |

## References

- 1 N. F. Chilton, D. Collison, E. J. L. McInnes, R. E. P. Winpenny and A. Soncini, *Nat. Commun.*, 2013, **4**, 2551.
